# Supplementary material
Source: MDPI journal article supplement (https://www.mdpi.com/2071-1050/9/6/993)
Supplement: s1 [file s1]

# Modeling of Turbidity Variation in Two Reservoirs Connected by a Water Transfer Tunnel in South Korea

Jae Chung Park <sup>1</sup>, Myoung-Jin Um <sup>2</sup>, Young-Il Song <sup>3</sup>, Hyun-Dong Hwang <sup>4</sup>, Mun Mo Kim <sup>5</sup> and Daeryong Park <sup>6,\*</sup>

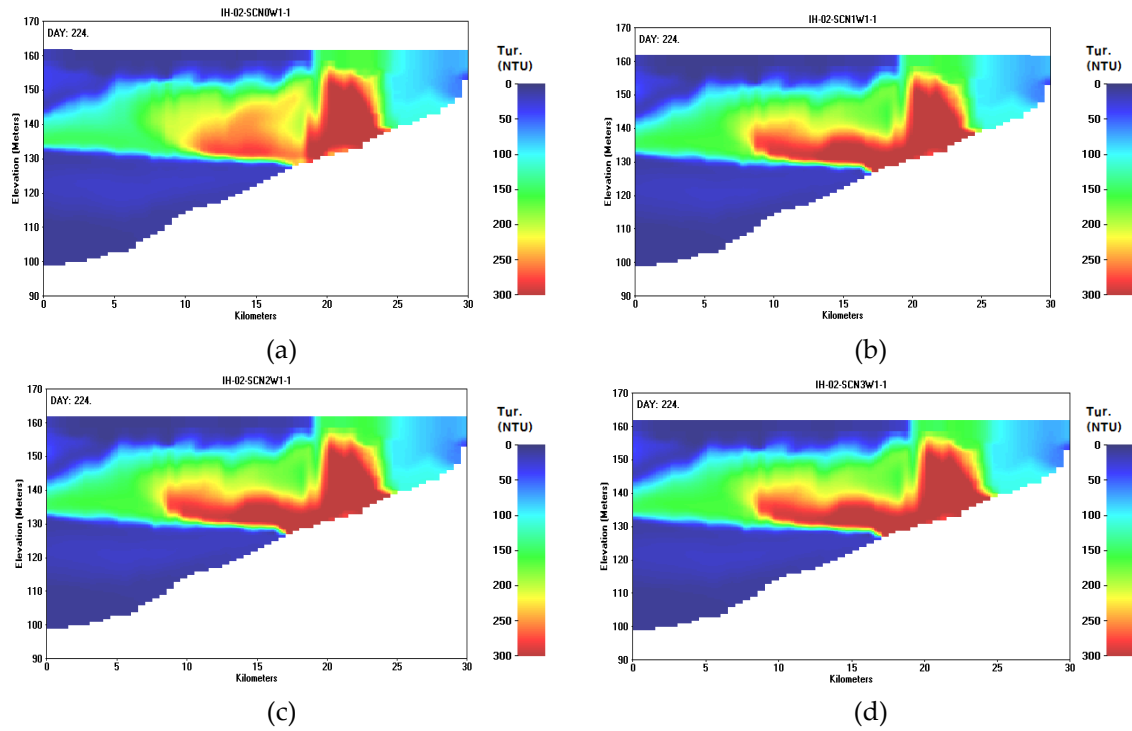

**Figure s1.** Two-dimensional turbidity distribution on 2002/08/12 (Case 2) at Imha reservoir; (a) Without tunnel; (b) Withdrawal 1 (EL. 141.0m); (c) Withdrawal 2 (EL. 146.5m); (d) Withdrawal 3 (EL. 152.0m).

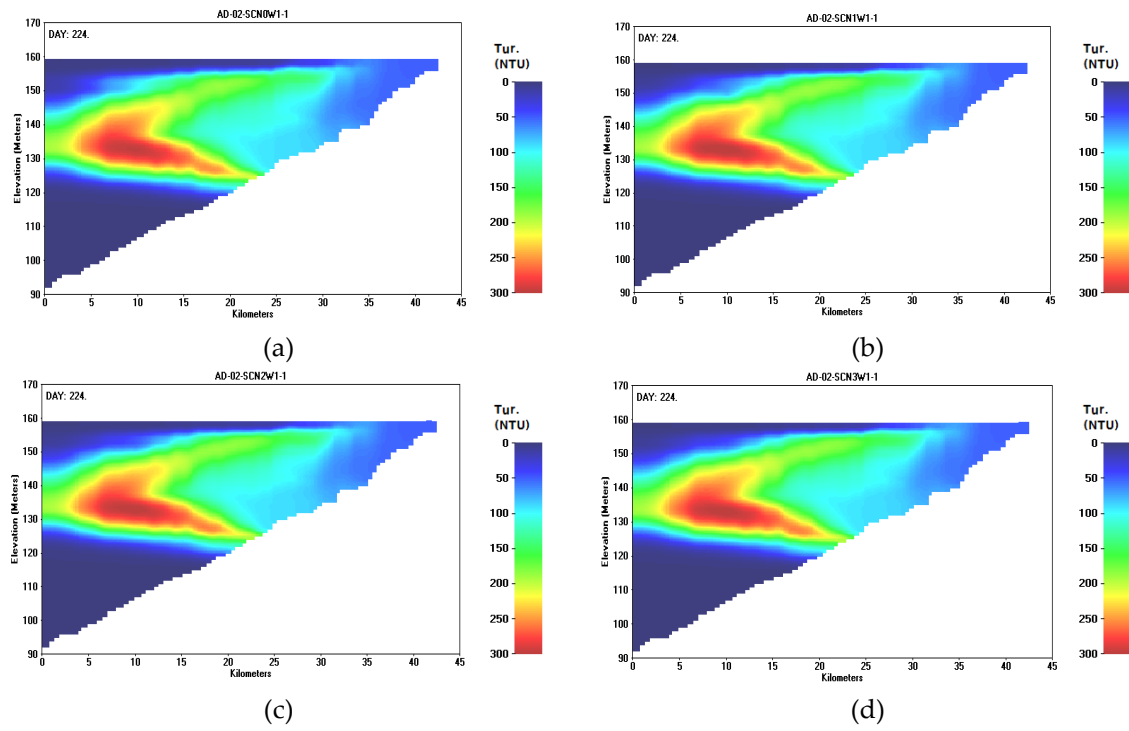

**Figure s2.** Two-dimensional turbidity distribution on 2002/08/12 (Case 2) at Andong reservoir; (a) Without tunnel; (b) Withdrawal 1 (EL. 141.0m); (c) Withdrawal 2 (EL. 146.5m); (d) Withdrawal 3 (EL. 152.0m).

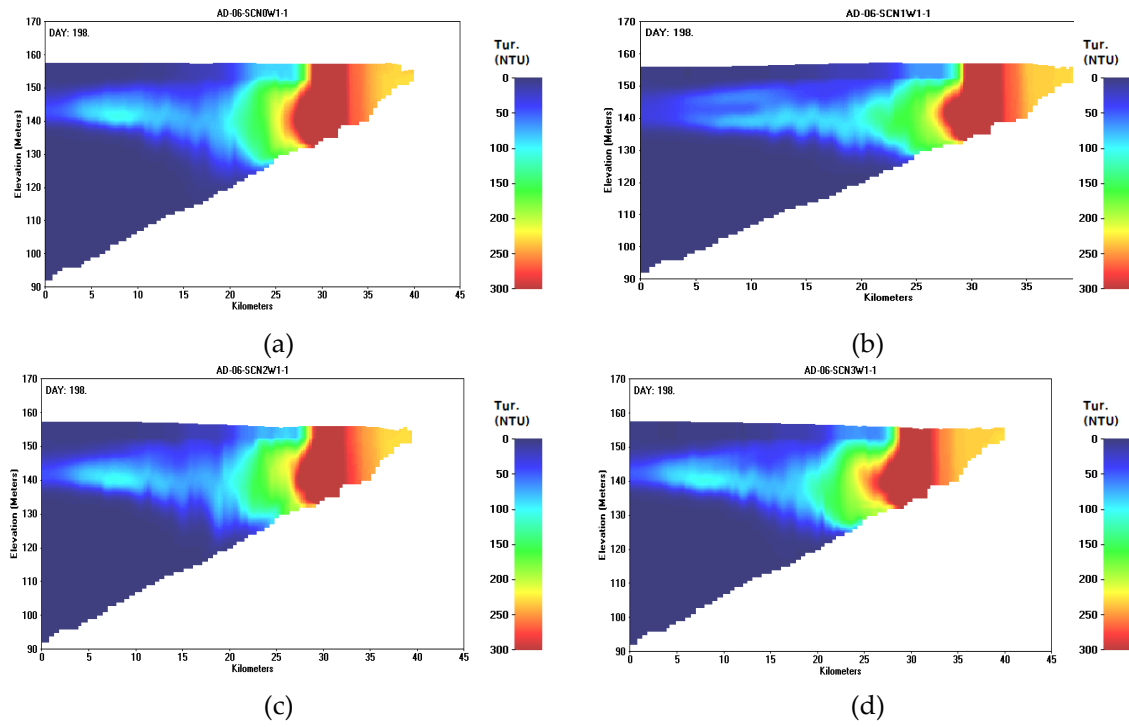

**Figure s3.** Two-dimensional turbidity distribution on 2006/07/17 (Case 4) at Andong reservoir; (a) Without tunnel; (b) Withdrawal 1 (EL. 141.0m); (c) Withdrawal 2 (EL. 146.5m); (d) Withdrawal 3 (EL. 152.0m).
